# Supplementary material
Source: Elsevier journal article supplement (https://www.sciencedirect.com/science/article/pii/S002577532100734X)
Supplement: mmc1 [file S002577532100734X:mmc1.pdf]

**Supplementary Table 1**

Patient management and actions taken after stroke/SE or major bleeding.

|                                                                                         | Stroke/SE (n=188)  | Major bleeding (n=397) | P-value               |
|-----------------------------------------------------------------------------------------|--------------------|------------------------|-----------------------|
| <b>Patient management</b>                                                               |                    |                        |                       |
| Hospitalization                                                                         | 182 (96.8)         | 345 (87.1)             | <del>0.0002</del>     |
| Hospitalization period (days), mean (95% CI)                                            | 10.1 (8.5 - 11.6)  | 13.7 (7.3 - 20.1)      | <del>0.7204</del>     |
| <b>Actions taken after the event</b>                                                    |                    |                        |                       |
| VKA discontinuation (Yes)                                                               | 116 (61.7)         | 301 (75.8)             | <del>0.0004</del>     |
| Heparin bridge therapy (Yes)                                                            | 114 (60.6)         | 161 (40.6)             | <del>&lt;0.0001</del> |
| Non-pharmacological measures (Yes)                                                      | 1 (0.5)            | 11 (2.8)               | <del>0.1152</del>     |
| Time (days) between VKA discontinuation and reintroduction of medication, mean (95% CI) | 14.5 (9.3 - 19.8)  | 26.3 (19.9 - 32.7)     | <del>0.0002</del>     |
| VKA maintenance (Yes)                                                                   | 82 (46.9)          | 222 (62.9)             | <del>&lt;0.0001</del> |
| Treatment change (Yes)                                                                  | 79 (45.4)          | 81 (23.2)              | <del>&lt;0.0001</del> |
| <b>Anticoagulation grade</b>                                                            |                    |                        |                       |
| Last value INR, mean (95% CI)                                                           | 2.4 (2.3 - 2.6)    | 2.6 (2.5 - 2.8)        | <del>0.0111</del>     |
| INR in therapeutic range (Yes)                                                          | 98 (53)            | 211 (54.4)             | <del>0.7518</del>     |
| INR, mean (95% CI)                                                                      | 2.2 (2.0 - 2.3)    | 4.0 (3.5 - 4.4)        | <del>&lt;0.0001</del> |
| INR at admission in therapeutic range (Yes)                                             | 63 (34.1)          | 115 (29.7)             | <del>0.2945</del>     |
| TTR Rosendaal calculated mean (95% CI)                                                  | 56.5 (51.4 - 61.6) | 56.0 (52.7 - 59.3)     | <del>0.5069</del>     |
| TTR control (<65%)                                                                      | 96 (51.9)          | 220 (56.7)             | <del>0.2791</del>     |

Abbreviations: VKA: vitamin K antagonist; CI: confidence interval; INR: international normalized ratio; SE: systemic embolism; TTR: time in therapeutic range.

Data are presented as n (%) unless otherwise indicated.

**Supplementary Table 2**

Common situation after hospital discharge.

|                                                    | <b>Stroke/SE<br/>(n=188)</b> | <b>Major bleeding<br/>(n=397)</b> | <b>P-value</b>        |
|----------------------------------------------------|------------------------------|-----------------------------------|-----------------------|
| Total functional independence                      | 42 (22.3)                    | 238 (60.0)                        | <del>&lt;0.0001</del> |
| Neurological sequelae                              | 105 (55.9)                   | 51 (12.9)                         | <del>&lt;0.0001</del> |
| Post-thrombotic syndrome                           | 3 (1.6)                      | 0 (0)                             | <del>0.0328</del>     |
| Pulmonary hypertension                             | 1 (0.5)                      | 0 (0)                             | <del>0.3214</del>     |
| Another situation at discharge after the event     | 13 (6.9)                     | 28 (7.1)                          | <del>0.9513</del>     |
| Death                                              | 27 (14.4)                    | 98 (24.7)                         | <del>0.0044</del>     |
| Time between event and death (days), mean (95% CI) | n = 27                       | n = 96                            |                       |
|                                                    | 43.7 (7.1 - 80.4)            | 131.4 (83.6 - 179.2)              | <del>0.5673</del>     |
| Relationship between death and event (Yes)         | 20 (74.1)                    | 58 (59.8)                         | <del>0.1743</del>     |

Abbreviations: CI: confidence interval; SE: systemic embolism.

Data are presented as n (%) unless otherwise indicated.
